# Supplementary material
Source: PubMed Central journal article supplement (PMC3663548)
Supplement: supp_M112.427047_jbc.M112.427047-1.pdf [file supp_M112.427047_jbc.M112.427047-1.pdf]

| Primer name                    | Primer sequence (5'-3')                           | Description                                             |
|--------------------------------|---------------------------------------------------|---------------------------------------------------------|
| <i>gadA5-F-KpnI</i>            | GGGGTACC GGTAATGCAAACAAAACCTTGG                   | 5' homologous region forward primer                     |
| <i>gadA5-R-HindIII</i>         | CCC AAGCTT CTGAAATTCCTTTAACATC                    | 5' homologous region reverse primer                     |
| <i>gadA3-F-PstI</i>            | AACTGCAG AAGCTTGTCTAGATCATGGTATTTTC               | 3' homologous region forward primer                     |
| <i>gadA3-R-BamHI</i>           | CGGGATCC GAGTGGATGCATTCAAAAGTAC                   | 3' homologous region reverse primer                     |
| <i>gadB5-F-KpnI</i>            | GGGGTACC GGACGGTGTGGTGGAGATGATAGTGGTGAAGATGAC     | 5' homologous region forward primer                     |
| <i>gadB5-R-HindIII</i>         | CCC AAGCTT CATATTGTAATGTAAATGTTACACCAAGAG         | 5' homologous region reverse primer                     |
| <i>gadB3-F-PstI</i>            | AACTGCAG TTCATGTTGATGCAGCAAGTGGTGGATTG            | 3' homologous region forward primer                     |
| <i>gadB3-R-BamHI</i>           | CGGGATCC CGAAGATTTAGAAACCAATAAAGATGGTAATCTCTAC    | 3' homologous region reverse primer                     |
| <i>gabT-F<sup>(1)</sup></i>    | GTCAGATTGAAATTACCCACCCC                           | Forward primer for cloning <i>gabT</i> genomic fragment |
| <i>gabT-R<sup>(1)</sup></i>    | GAGGTGAGATTCCAATGTTTCGTG                          | Reverse primer for cloning <i>gabT</i> genomic fragment |
| <i>DdvGAT-F5-KpnI</i>          | GGGGTACC ATGGCTTATAACTCAAGAAATAGTAGTAG            | 5' homologous region forward primer                     |
| <i>DdvGAT-R5-HindIII</i>       | CCC AAGCTT TAAACAATCCAAATCATTGGAATGTAACC          | 5' homologous region reverse primer                     |
| <i>DdvGAT-F3-PstI</i>          | AACTGCAG AAGGATAACCATGTTTCATCCAC                  | 3' homologous region forward primer                     |
| <i>DdvGAT-R3-BamHI</i>         | CGGGATCC CAAGATAGTTGCCATAATACC                    | 3' homologous region reverse primer                     |
| <i>grlB5-F-KpnI</i>            | GGGGTACC AAGTGGTGACTTTTCAGATC                     | 5' homologous region forward primer                     |
| <i>grlB5-R-SalI</i>            | GCGTCGACT CCCGAGGTCAATGTACATTG                    | 5' homologous region reverse primer                     |
| <i>grlB3-F-PstI</i>            | AACTGCAG GAAGGAATCTGTAGAGCAAG                     | 3' homologous region forward primer                     |
| <i>grlB3-R-BamHI</i>           | CGGGATCC CATCTTCACTACTACTAG                       | 3' homologous region reverse primer                     |
| <i>grlE5-F-KpnI</i>            | GGGGTACC CAGAAGTTGTTAAACCAAACCC                   | 5' homologous region forward primer                     |
| <i>grlE5-R-HindIII</i>         | CCC AAGCTT GATTACGAAGTTCAGTTCTAAC                 | 5' homologous region reverse primer                     |
| <i>grlE3-F-BamHI</i>           | CGGGATCC TACAGGTGATAGATTGTATGG                    | 3' homologous region forward primer                     |
| <i>grlE3-R-NotI</i>            | ATTTGCGGCCGCAAAGATTGGTTCAGCCAATGG                 | 3' homologous region reverse primer                     |
| <i>gadA-F-BglII</i>            | GAAGATCT TAAAAAATGTCACCTTCATCATGTCAAAAAC          | Forward primer for amplifying <i>gadA</i> cDNA          |
| <i>gadA-R1-SpeI</i>            | GGACTAGT TTAATGATGGAATGATTGACCTTC                 | Reverse primer for amplifying <i>gadA</i> cDNA          |
| <i>gadA-R2-SpeI</i>            | GGACTAGT ATGATGGAATGATTGACCTTC                    | Reverse primer without stop codon                       |
| <i>gadB-F-BamHI</i>            | CGGGATCC TAAAAAATGCCATTACATATTGTTGATAAAC          | Forward primer for amplifying <i>gadB</i> genomic DNA   |
| <i>gadB-R1-SpeI</i>            | GGACTAGT TTAATGATGGAATTTTCACCTTCATC               | Reverse primer for amplifying <i>gadB</i> genomic DNA   |
| <i>gadB-R2-SpeI</i>            | GGACTAGT ATGATGGAATTTTCACCTTCATC                  | Reverse primer without stop codon                       |
| <i>gabT-F-BamHI</i>            | CGGGATCC AAACAATGCTTTCATCAAGATTAATTAATGTTTAAAGTTC | Forward primer for amplifying <i>gabT</i> cDNA          |
| <i>gabT-R-SpeI</i>             | GGACTAGT ATTTTATATAATTCTTCATTGTTTGATCGAAACG       | Reverse primer for amplifying <i>gabT</i> cDNA          |
| <i>DdvGAT-F-BglII</i>          | GAAGATCT ATGGCTTATAACTCAAGAAATAG                  | Forward primer for amplifying <i>DdvGAT</i> cDNA        |
| <i>DdvGAT-R-SpeI</i>           | GGACTAGT TTAATTTGATGGATCTACAAAAGC                 | Reverse primer for amplifying <i>DdvGAT</i> cDNA        |
| <i>grlB-F-BamHI</i>            | CGGGATCC AATAAAAATGAAAAATTAATTTCAATTATTC          | Forward primer for amplifying <i>grlB</i> cDNA          |
| <i>grlB-R1-NheI</i>            | CCGGCTAGC TTAAAGGTTATTAGAATCAATTTTC               | Reverse primer for amplifying <i>grlB</i> cDNA          |
| <i>grlB-R2-NheI</i>            | CCGGCTAGC AAGGTTATTAGAATCAATTTCAAC                | Reverse primer without stop codon                       |
| <i>gadA-RT-F</i>               | GACCTTCAGATAGAATGAG                               | Forward qPCR primer for <i>gadA</i>                     |
| <i>gadA-RT-R</i>               | TGGAATGATTGACCTTCATC                              | Reverse qPCR primer for <i>gadA</i>                     |
| <i>gadB-RT-F</i>               | GTAAGAATTTACCCTCTGAAC                             | Forward qPCR primer for <i>gadB</i>                     |
| <i>gadB-RT-R</i>               | AATCTCTAGAGAAACCATGAC                             | Reverse qPCR primer for <i>gadB</i>                     |
| <i>rnlA-RT-F<sup>(2)</sup></i> | TTACATTTATTAGACCCGAAACCAAGCG                      | Forward qPCR primer for <i>rnlA</i>                     |
| <i>rnlA-RT-R<sup>(2)</sup></i> | TTCCCTTTAGACCTATGGACCTTAGCG                       | Reverse qPCR primer for <i>rnlA</i>                     |

Table S1. Primers used in this research. Nucleotides labeled in red indicate restriction sites.

1. Anjard, C., Su, Y., and Loomis, W. F. (2009) *Development* **136**, 803-812
2. Nagasaki, A., Itoh, G., Yumura, S., and Uyeda, T. Q. (2002) *Mol Biol Cell* **13**, 4333-4342
